# Supplementary material
Source: PubMed Central journal article supplement (PMC2872271)
Supplement: mmc1.pdf [file mmc1.pdf]

Biophysical Journal, Volume 98

**Supporting Material**

**Influence of the Lipid Anchor Motif of N-Ras on the Interaction with Lipid Membranes – a Surface Plasmon Resonance Study**

Andrea Gohlke, Gemma Triola, Herbert Waldmann, and Roland Winter

# **Influence of the Lipid Anchor Motif of N-Ras on the Interaction with Lipid Membranes – a Surface Plasmon Resonance Study**

Andrea Gohlke <sup>1</sup>, Gemma Triola <sup>2,3</sup>, Herbert Waldmann <sup>2,3</sup>, and Roland Winter <sup>1</sup>

<sup>1</sup> University of Dortmund, Department of Chemistry, Physical Chemistry I - Biophysical Chemistry, Otto-Hahn-Str. 6, D-44227 Dortmund, Germany

<sup>2</sup> TU Dortmund, Department of Chemistry, Chemical Biology, Otto Hahn-Str. 6, 44227 Dortmund, Germany

<sup>3</sup> Max Planck-Institute of Molecular Physiology, Department of Chemical Biology, Otto-Hahn-Str. 11, 44227 Dortmund, Germany

## **Supplementary Information**

### **Table I**

**Table 1** Summary of all kinetic constants of the interaction of the various N-Ras lipoproteins with lipid bilayer membranes.

|                               | $k_{on,1} / M^{-1} s^{-1}$            | $k_{on,2} / s^{-1}$                         | $k_{off,1} / s^{-1}$                        | $k_{off,2} / s^{-1}$                        |
|-------------------------------|---------------------------------------|---------------------------------------------|---------------------------------------------|---------------------------------------------|
| <b>DOPC</b>                   |                                       |                                             |                                             |                                             |
| Far GDP                       | $2.57 \cdot 10^5 \pm 1.09 \cdot 10^5$ | $4.57 \cdot 10^{-3} \pm 1.89 \cdot 10^{-3}$ | $4.01 \cdot 10^{-2} \pm 8.00 \cdot 10^{-3}$ | $1.11 \cdot 10^{-3} \pm 2.30 \cdot 10^{-4}$ |
| HD/Far GDP                    | $3.41 \cdot 10^3 \pm 7.60 \cdot 10^2$ | $5.09 \cdot 10^{-3} \pm 3.14 \cdot 10^{-3}$ | $1.20 \cdot 10^{-3} \pm 6.04 \cdot 10^{-4}$ | $4.52 \cdot 10^{-4} \pm 2.20 \cdot 10^{-4}$ |
| HD/Far GTP                    | $6.00 \cdot 10^4 \pm 2.31 \cdot 10^4$ | $3.81 \cdot 10^{-5} \pm 2.11 \cdot 10^{-5}$ | $1.99 \cdot 10^{-3} \pm 6.87 \cdot 10^{-4}$ | $6.51 \cdot 10^{-6} \pm 4.56 \cdot 10^{-6}$ |
| HD/HD GDP                     | $7.02 \cdot 10^4 \pm 2.22 \cdot 10^4$ | $3.07 \cdot 10^{-7} \pm 1.00 \cdot 10^{-7}$ | $3.62 \cdot 10^{-3} \pm 2.78 \cdot 10^{-4}$ | $1.18 \cdot 10^{-4} \pm 1.17 \cdot 10^{-5}$ |
| Far/Far GDP                   | $5.88 \cdot 10^4 \pm 2.08 \cdot 10^4$ | $2.69 \cdot 10^{-3} \pm 3.54 \cdot 10^{-4}$ | $1.1 \cdot 10^{-3} \pm 2.31 \cdot 10^{-4}$  | $6.04 \cdot 10^{-4} \pm 1.40 \cdot 10^{-4}$ |
| <b>DPPC/Chol (7:3)</b>        |                                       |                                             |                                             |                                             |
| Far GDP                       | $8.17 \cdot 10^4 \pm 1.52 \cdot 10^4$ | $3.53 \cdot 10^{-3} \pm 4.44 \cdot 10^{-4}$ | $2.71 \cdot 10^{-3} \pm 1.59 \cdot 10^{-3}$ | $5.54 \cdot 10^{-4} \pm 1.88 \cdot 10^{-4}$ |
| HD/Far GDP                    | $1.48 \cdot 10^5 \pm 1.11 \cdot 10^4$ | $1.70 \cdot 10^{-3} \pm 8.67 \cdot 10^{-4}$ | $6.81 \cdot 10^{-3} \pm 1.82 \cdot 10^{-3}$ | $6.65 \cdot 10^{-4} \pm 2.25 \cdot 10^{-4}$ |
| HD/Far GTP                    | $4.30 \cdot 10^4 \pm 7.59 \cdot 10^3$ | $2.63 \cdot 10^{-3} \pm 1.18 \cdot 10^{-3}$ | $1.83 \cdot 10^{-2} \pm 3.55 \cdot 10^{-3}$ | $1.41 \cdot 10^{-4} \pm 1.35 \cdot 10^{-4}$ |
| HD/HD GDP                     | $4.11 \cdot 10^4 \pm 1.16 \cdot 10^4$ | $9.54 \cdot 10^{-4} \pm 2.64 \cdot 10^{-4}$ | $2.34 \cdot 10^{-2} \pm 5.63 \cdot 10^{-3}$ | $7.56 \cdot 10^{-7} \pm 5.70 \cdot 10^{-7}$ |
| Far/Far GDP                   | $4.11 \cdot 10^5 \pm 8.67 \cdot 10^4$ | $1.75 \cdot 10^{-3} \pm 1.65 \cdot 10^{-4}$ | $1.86 \cdot 10^{-2} \pm 4.83 \cdot 10^{-3}$ | $3.25 \cdot 10^{-4} \pm 1.60 \cdot 10^{-4}$ |
| <b>DOPC/DPPC/Chol (1:2:1)</b> |                                       |                                             |                                             |                                             |
| Far GDP                       | $1.06 \cdot 10^5 \pm 6.15 \cdot 10^4$ | $1.40 \cdot 10^{-6} \pm 1.21 \cdot 10^{-6}$ | $9.20 \cdot 10^{-4} \pm 1.39 \cdot 10^{-4}$ | $1.63 \cdot 10^{-5} \pm 5.11 \cdot 10^{-6}$ |
| HD/Far GDP                    | $9.88 \cdot 10^4 \pm 3.37 \cdot 10^4$ | $2.56 \cdot 10^{-3} \pm 1.34 \cdot 10^{-3}$ | $9.36 \cdot 10^{-4} \pm 6.43 \cdot 10^{-4}$ | $4.38 \cdot 10^{-4} \pm 2.14 \cdot 10^{-4}$ |
| HD/Far GTP                    | $3.69 \cdot 10^4 \pm 9.83 \cdot 10^3$ | $7.37 \cdot 10^{-4} \pm 5.09 \cdot 10^{-4}$ | $3.50 \cdot 10^{-3} \pm 4.91 \cdot 10^{-4}$ | $3.10 \cdot 10^{-7} \pm 1.28 \cdot 10^{-7}$ |
| HD/HD GDP                     | $5.21 \cdot 10^4 \pm 1.11 \cdot 10^4$ | $4.37 \cdot 10^{-4} \pm 2.71 \cdot 10^{-4}$ | $7.41 \cdot 10^{-3} \pm 3.82 \cdot 10^{-3}$ | $3.02 \cdot 10^{-7} \pm 9.95 \cdot 10^{-8}$ |
| Far/Far GDP                   | $1.63 \cdot 10^5 \pm 7.97 \cdot 10^4$ | $1.78 \cdot 10^{-3} \pm 4.18 \cdot 10^{-4}$ | $1.11 \cdot 10^{-3} \pm 3.17 \cdot 10^{-4}$ | $6.36 \cdot 10^{-4} \pm 1.84 \cdot 10^{-4}$ |
| <b>DOPC/DOPG (7:3)</b>        |                                       |                                             |                                             |                                             |
| Far GDP                       | $1.72 \cdot 10^5 \pm 7.36 \cdot 10^4$ | $1.84 \cdot 10^{-4} \pm 1.21 \cdot 10^{-4}$ | $3.54 \cdot 10^{-3} \pm 1.75 \cdot 10^{-4}$ | $4.32 \cdot 10^{-6} \pm 3.61 \cdot 10^{-6}$ |
| HD/Far GDP                    | $6.26 \cdot 10^3 \pm 3.67 \cdot 10^3$ | $2.79 \cdot 10^{-3} \pm 1.43 \cdot 10^{-3}$ | $8.21 \cdot 10^{-4} \pm 3.37 \cdot 10^{-4}$ | $4.07 \cdot 10^{-4} \pm 2.00 \cdot 10^{-4}$ |
| HD/Far GTP                    | $4.52 \cdot 10^4 \pm 2.16 \cdot 10^4$ | $6.14 \cdot 10^{-4} \pm 1.63 \cdot 10^{-4}$ | $5.00 \cdot 10^{-3} \pm 3.47 \cdot 10^{-4}$ | $3.78 \cdot 10^{-7} \pm 1.56 \cdot 10^{-7}$ |
| HD/HD GDP                     | $6.71 \cdot 10^4 \pm 1.51 \cdot 10^4$ | $2.83 \cdot 10^{-4} \pm 9.91 \cdot 10^{-5}$ | $1.07 \cdot 10^{-2} \pm 3.77 \cdot 10^{-3}$ | $4.47 \cdot 10^{-6} \pm 2.63 \cdot 10^{-6}$ |
| Far/Far GDP                   | $8.09 \cdot 10^4 \pm 1.42 \cdot 10^4$ | $1.88 \cdot 10^{-3} \pm 1.98 \cdot 10^{-4}$ | $1.49 \cdot 10^{-3} \pm 2.14 \cdot 10^{-4}$ | $9.06 \cdot 10^{-4} \pm 5.80 \cdot 10^{-5}$ |
| <b>DOPC/DOPE (7:3)</b>        |                                       |                                             |                                             |                                             |
| Far GDP                       | $2.80 \cdot 10^5 \pm 7.07 \cdot 10^4$ | $1.61 \cdot 10^{-3} \pm 1.05 \cdot 10^{-3}$ | $1.09 \cdot 10^{-2} \pm 4.18 \cdot 10^{-3}$ | $5.54 \cdot 10^{-4} \pm 1.65 \cdot 10^{-4}$ |
| HD/Far GDP                    | $5.00 \cdot 10^3 \pm 3.41 \cdot 10^3$ | $1.21 \cdot 10^{-3} \pm 2.35 \cdot 10^{-4}$ | $3.50 \cdot 10^{-4} \pm 1.26 \cdot 10^{-4}$ | $9.53 \cdot 10^{-6} \pm 2.26 \cdot 10^{-6}$ |
| HD/Far GTP                    | $8.19 \cdot 10^4 \pm 3.50 \cdot 10^4$ | $9.35 \cdot 10^{-5} \pm 2.58 \cdot 10^{-5}$ | $2.59 \cdot 10^{-3} \pm 2.91 \cdot 10^{-4}$ | $6.87 \cdot 10^{-6} \pm 4.26 \cdot 10^{-6}$ |
| HD/HD GDP                     | $4.88 \cdot 10^4 \pm 3.73 \cdot 10^3$ | $5.02 \cdot 10^{-7} \pm 3.01 \cdot 10^{-7}$ | $3.00 \cdot 10^{-3} \pm 3.97 \cdot 10^{-4}$ | $2.27 \cdot 10^{-5} \pm 1.04 \cdot 10^{-5}$ |
| Far/Far GDP                   | $1.15 \cdot 10^5 \pm 2.55 \cdot 10^4$ | $2.84 \cdot 10^{-3} \pm 3.54 \cdot 10^{-4}$ | $1.89 \cdot 10^{-3} \pm 4.22 \cdot 10^{-4}$ | $7.19 \cdot 10^{-4} \pm 1.26 \cdot 10^{-4}$ |
